# Supplementary material for: Breast organoid suspension cultures maintain long-term estrogen receptor expression and responsiveness
Source: Research Square preprint supplement (doi:10.21203/rs.3.rs-4463390/v1), 2024-06-17
Supplement: Supplementary file 2 [file 13d6daaaa5afd421cb18d808.xlsx]

## Sheet: Fig.1b
			SC			MD
			HS	LASP	BA	HS	LASP	BA	(%)
		ORG4	70.7	7.57	11.4	67.5	14.7	9.37
		ORG5	17.9	11.1	60.1	3.75	15.5	75.7
		ORG6	22.1	34.7	37.3	15.6	25.8	52.5
		ORG7	55.7	29.8	11.3	31.7	52.1	10.2
		ORG8	13.9	62.6	15.5	14.6	53.9	20.2
		ORG9	7.15	12.3	72.7	3.34	30.2	58

## Sheet: Fig. 1c
														T.Test
		ORG4		ORG5		ORG6		ORG7		ORG9				ORG4		ORG5		ORG6		ORG7		ORG9
		Suspension cultures	Matrigel domes	Suspension cultures	Matrigel domes	Suspension cultures	Matrigel domes	Suspension cultures	Matrigel domes	Suspension cultures	Matrigel domes			9.98619e-08		0.00863404		0.893455		0.0698046		0.00026826
		15601	4124	5626	6188	3298	3370	7220	5392	6679.69	7164
		38000	1200	1080	6336	1740	2404	2560	2044	13684.1	35388
		25860	2252	7835	16306	1313	19136	37336	2988	5429.69	764
		46368	3855	12092	8708	6777	28743	49696	44492	24948.7	11776
		12071	2099	668	4020	5020	752	40484	20100	24931.6	640
		27765	956	4000	9680	4669	1740	6924	11700	57998	4380
		5088	398	17574	4836	4861	4004	1870	4848	15175.8	752
		6840	3668	23432	498	1200	23088	12116	3076	10380.9	752
		5215	2736	6872	764	1760	4315	19836	5368	3713.38	810
		7564	1744	10864	390	3212	240	12244	1200	3701.17	3632
		12458	5062	15684	830	6018	864	5944	4114	3505.86	2700
		38612	4220	9548	1947	3274	4666	8812	3436	10078.1	928
		6176	2308	7882	1648	1052	2004	13048	5460	4384.77	800
		2478	2944	4128	492	6152	1752	15076	1530	5429.69	792
		3188	474	1396	1592	3740	2758	16344	8188	9345.7	1664
		3689	3140	1882	780	16408	2508	11152	2168	6494.14	4292
		14736	730	6084	8752	11938	2177	5924	2100	2490.23	4736
		14252	2242	14956	4068	4644	1968	2476	3648	7326.66	1308
		17628	1008	4650	1696	2162	456	3640	1028	16821.3	1200
		1226	1363	3370	561	5484	1664	2632	9060	36694.3	1440
		8204	1396	4548	406	8524	1741	3268	2912	9130.86	1132
		15465	416	2414	356	10254	812	8604	2052	3369.14	752
		5771	7220	1836	940	1828	1161	6628	5272	11030.3	612
		12742	600	1098	538	798	913	5976	5412	41479.5	540
		18148	207	2217	3550	1312	1219	3412	3648	20666.5	2128
		8550	316	3244	1324	2504	860	4708	2140	10898.4	1560
		29556	86	5094	2832	1640	1776	4052	7284	3139.65	320
		11208	1263	1729	1348	2881	4352	3864	2920	16860.4	860
		30484	356	2248	616	3852	2186	6228	3550	11801.8	1308
		11480	389	8589	330	3852	2882	4192	4248	4340.82	812

## Sheet: Fig. 2b
								T.Test
		ORG12		ORG5				ORG12		ORG5
		Suspension cultures	Matrigel domes	Suspension cultures	Matrigel domes			0.000169366		3.57098e-10
		17176	2995	20140.4	115.293
		8738	2552	14464.5	150.648
		2952	1334	5124.2	156.259
		5945	774	2009.15	152.995
		14924	2004	1865.12	189.982
		4952	944	5341.47	198.83
		11028	460	2685.38	154.352
		4877	2294	12787.3	193.45
		1728	1592	7040.59	237.203
		1592	857	5229.17	220.828
		15032	2772	6098.26	175.383
		7073	895	18568.2	224.458
		1424	1410	6811.11	159.482
		288	389	3168.75	223.711
		2294	1412	8153.8	194.328
		5020	3124	6684.16	203.217
		2958	783	3158.99	196.187
		3054	1828	5868.78	109.13
		1132	1320	15653.3	148.709
		1724	535	27517.8	121.285
		2800	1232	9345.13	123.609
		884	820	3486.11	194.919
		1710	1496	9413.49	147.517
		1472	292	4264.88	193.363
		3648	284	17511.1	174.583
		2248	1052	5563.62	147.664
		857	1946	10165.4	121.096
		5673	692	3300.58	208.13
		2628	1312	7338.42	172.465
		4128	430	12421.1	134.964

## Sheet: Fig. 2c
	10days
	EdU positive %
	Organoid lines	SC	MD
	ORG12	38.6	28.1
	ORG5	38.4	14.1

## Sheet: Fig. 2d
	Flow cytometry by EpCAM and CD49f expression
ORG5		HS	LASP	BA	(%)
	SC	15.6	54.2	25.3
	MD	3.37	65.3	19.2
ORG12		HS	LASP	BA	(%)
	SC	21.7	67.2	7.75
	MD	37.2	39.3	16.6

## Sheet: Fig. 2e
	10days
	EdU positive %
	Organoid lines	SC > SC	SC > MD
	ORG2	23.8	11
	ORG5	54.1	24.3
	ORG7	34.9	13.6
	ORG8	43.3	24
	ORG9	58.1	29.6
	ORG11	38.8	29.2
					T. Test
		42.1667	21.95		0.00769022

## Sheet: Fig. 4c
Flow Cytometry by EpCAM and CD49f
	ORG4				ORG6
	HS	LASP	BA	(%)	HS	LASP	BA	(%)
	74.1	2.28	1.3		98	0.21	0.042
	82.4	5.31	0.64		98.9	0.1	0.05
	96.9	0.39	0.15		96.7	0.92	0.39
	90.5	0	0.89

## Sheet: Fig. 5a
			HS
			5% more than 2 months
								lines
	ORG2											T test value
		Untreated control	Untreated control	Untreated control	E2	E2	E2	E2+TGFB2i	E2+TGFB2i	E2+TGFB2i		E2 vs untreated	E2+TGFB2i vs untreated	E2+TGFB2i vs E2
	ER	1	1	1	0.67	0.27	1.68	0.4	0.39	4.65		0.77776	0.597045	0.559624
	GREB1	1	1	1	25.2	11.19	5.26	14.57	13.57	31.51		0.0948158	0.0315458	0.509567
	PR	1	1	1	5.43	15.36	2.05	9.45	25.9	7.96		0.173129	0.0795772	0.384837
	TFF1	1	1	1	4.56	14.6	3.47	4.96	22.58	5.91		0.138441	0.150737	0.620403
	Wnt4	1	1	1	1.28	0.83	0.79	3.77	4.39	3.89		0.842333	9.16932e-05	0.000244895
	ORG5	test1	test2	test3	test1	test2	test3	test1	test2	test3		T test value
		Untreated control	Untreated control	Untreated control	E2	E2	E2	E2+TGFB2i	E2+TGFB2i	E2+TGFB2i		E2 vs untreated	E2+TGFB2i vs untreated	E2+TGFB2i vs E2
	ER	1	1	1	1.3	1.76	0.92	2.36	2.38	1.73		0.249787	0.00561742	0.0621571
	GREB1	1	1	1	5.94	7.03	4.85	6.82	7.98	9.33		0.00142273	0.000629413	0.0936456
	PR	1	1	1	1.87	1.93	0.97	5.3	6.22	6.07		0.130199	6.91464e-05	0.00053257
	TFF1	1	1	1	3.45	3.45	1.9	2.55	6.32	4.5		0.0200873	0.0336779	0.274786
	Wnt4	1	1	1	1.59	2.39	0.9	3.8	6.17	3.67		0.219203	0.0120155	0.03368

## Sheet: Fig. 5c
		HS sorted from	test1	test2	test3	test1	test2	test3		T.test
		ORG1	Untreated control	Untreated control	Untreated control	E2	E2	E2
	ER		1	1	1	0.674502	0.84453	0.479068		0.0340851
	GREB1		1	1	1	6.44361	15.7103	3.93345		0.098107
	PR		1	1	1	2.58236	4.2115	3.3324		0.00725308
	TFF1		1	1	1	6.42689	9.14174	3.54346		0.0293024
	Wnt4		1	1	1	1.17574	1.86956	0.780912		0.435576
			test1	test2	test3	test1	test2	test3
		ORG4	Untreated control	Untreated control	Untreated control	E2	E2	E2
	ER		1	1	1	0.933509	1.0111	1.04524		0.923399
	GREB1		1	1	1	5.4603	8.04293	11.3425		0.0128696
	PR		1	1	1	4.78013	10.7078	2.08367		0.129204
	TFF1		1	1	1	13.5919	5.00151	9.15329		0.0292208
	Wnt4		1	1	1	1.47403	2.00197	2.89018		0.0532292
			test1	test2	test3	test1	test2	test3
		ORG11	Untreated control	Untreated control	Untreated control	E2	E2	E2
	ER		1	1	1	0.71	1.16	1.4		0.679325
	GREB1		1	1	1	3.4	4.76	5.34		0.00368098
	PR		1	1	1	2.09	1.44	3.87		0.113588
	TFF1		1	1	1	3.8	4.84	3.05		0.00505257
	Wnt4		1	1	1	1.34	1.01	1.2		0.127686

## Sheet: Supp. 5a
			test1	test2	test3	test1	test2	test3	test1	test2	test3		T.test
		Organoid lines	Untreated control	Untreated control	Untreated control	E2	E2	E2	E2+TGFB2i	E2+TGFB2i	E2+TGFB2i		E2 vs control	E2+TGFB2i vs control	E2+TGFB2i vs E2 only
		ORG1	1	1	1	1.57	2.29	2.94	2.94	8.92	8.38		0.0328561	0.039582	0.0832016
		ORG2	1	1	1	1.3	0.83	0.79	3.77	4.39	3.89		0.878526	9.16932e-05	0.000264267
		ORG6	1	1	1	1.28	0.79	1.16	3.8	4.47	5.97		0.63057	0.00428504	0.00507228
