# Supplementary material for: Breast organoid suspension cultures maintain long-term estrogen receptor expression and responsiveness
Source: Research Square preprint supplement (doi:10.21203/rs.3.rs-4463390/v1), 2024-06-17
Supplement: Supplementary file 4 [file 447c4dc81640c41df19eb92b.xlsx]

## Sheet: organoid medium formula
	No.	Ingredient	Resuspension buffer	Stock conc	Final conc	Stock to final conc. Ratio	add to 50mL (uL)	Vendor	Cat#
	1	R-spondinI	0.1%BSA/PBS	100 ug/mL	200 ng/mL	1:500	100	MedChemExpress (MCE)	120-38-50UG
	2	Noggin	0.1%BSA/PBS	100 ug/mL	100 ng/mL	1:1000	50	MedChemExpress (MCE)	HY-P7051A
	3	B27 supplement		50x	1x	1:50	1000	Life Tech	17504044
	4	N-acetyl L-cysteine	H2O	1 M	1.25 mM	1:800	62.5	Sigma	A9165-5G
	5	Nicotinamide	PBS	1M	10mM	1:100	500	Sigma	N0636-100G
	6	Y-27632 (ROCKi)	H2O	10 mM	5 uM	1:2000	25	ENZO	ALX-270-333-M025
	7	A83-01 (ALKi)	DMSO	500 uM	500nM	1:1000	50	Tocris	2939-10mg
	8	SB202190 (p38i)	DMSO	10 mM	1 uM	1:10000	5	Sigma	S7067-5MG
	9	h FGF-7	0.1%BSA/PBS	10 ug/mL	5 ng/mL	1:2000	25	Peprotech	100-19-50UG
	10	h FGF-10	0.1%BSA/PBS	100 ug/mL	20 ng/mL	1:5000	10	Peprotech	100-26- 50UG
	11	HeregulinB1	0.1%BSA/PBS	10 uM	5 nM	1:2000	25	Peprotech	100-03-50UG
	12	hEGF	0.1%BSA/PBS	100 ug/mL	5 ng/mL	1:20000	2.5	Peprotech	AF-100-15
	13	Adv DMEM/F12					46645	Invitrogen	12634028
	14	GlutaMax 100x					500	Invitrogen	35050-061
	15	HEPES 1M			10mM		500	Invitrogen	15630-080
	16	Pen/Strep					500	Gibco	15070063

## Sheet: reagents
REAGENT		SOURCE		IDENTIFIER
Chemicals, enzymes
TRIzol Reagent		Life Technologies		Cat# 15596018
Chloroform		VWR		Cat# MK443210
Isopropanol		ThermoFisher		Cat# BP26184
Dnase I		ThermoFisher		Cat# 18068015
Paraformaldehyde		Electron Microscopy Sciences		Cat# 19002
Triton X-100		Sigma-Aldrich		Cat# T8787
Bovine Serum Albumin		Sigma-Aldrich		Cat# A2153
DMSO		Sigma-Aldrich		Cat# D2650
Tween-20		Sigma-Aldrich		Cat# P1379
GlycoBlue		Life Technologies		Cat# AM9516
ProLong Gold Antifade Mountant		Life Technologies		Cat# P36930
DAPI		ThermoFisher		Cat# D1306
Matrigel (growth factor reduced)		Corning		Cat# 354230
Cultrex Reduced Growth Factor BME, Type 2, Pathclear		Cultrex		Cat#3533-010-02
TrypLE™ Express Enzyme (1X), no phenol red		Gibco		Cat#12604013
Collagenase from Clostridium histolyticum		Sigma-Aldrich		Cat#C9407
B-Estradiol		Sigma-Aldrich		Cat#E2257
Progestrone		Sigma-Aldrich		Cat#P8783
SB431542		Selleck Chemicals		Cat#S1067
RepSox		Stemcell		Cat#73792
