# Supplementary material for: Breast organoid suspension cultures maintain long-term estrogen receptor expression and responsiveness
Source: Research Square preprint supplement (doi:10.21203/rs.3.rs-4463390/v1), 2024-06-17
Supplement: Supplementary file 5 [file 81a51a79139a83538fa24c41.xlsx]

## Sheet: Sheet1
			No.	Age	Gender	Race	Gene	Alteration	GT result	Menopause Status
			ORG1	48	Female	White or Caucasian	Normal			Premenopause
			ORG2	21	Female	White or Caucasian	Normal			Premenopause
			ORG3	28	Female	White or Caucasian	Normal			Premenopause
			ORG4	58	Female	White or Caucasian	BRCA2	c.8537_8538delAG (p.Glu2846Glyfs*22)	Pathogenic	Surgical Menopause
			ORG5	67	Female	White or Caucasian	Normal			Postmenopause
			ORG6	47	Female	Asian	Normal			Premenopause
			ORG7	24	Female	White or Caucasian	Normal			Premenopause
			ORG8	25	Female	White or Caucasian	BRCA1	EX13_18del	Pathogenic	Premenopause
			ORG9	65	Female	White or Caucasian	BRCA1	c.5266dupC	Pathogenic	Postmenopause
			ORG10	48	Female	White or Caucasian	BRCA2	c.4631del (p.Asn1544Thrfs*24)	Pathogenic	Perimenopause
			ORG11	30	Female	White or Caucasian	Normal			Premenopause
			ORG12	38	Female	White or Caucasian	Normal			Premenopause
			ORG13	35	Female	White or Caucasian	BRCA2	c.7007+5G>A	Pathogenic	Premenopause
