# Supplementary material for: Breast organoid suspension cultures maintain long-term estrogen receptor expression and responsiveness
Source: Research Square preprint supplement (doi:10.21203/rs.3.rs-4463390/v1), 2024-06-17
Supplement: Supplementary file 6 [file 93120f0aec1991915c7fa2de.xlsx]

## Sheet: Heatmap data_HS signature gen  
Name	STC2	TFF3	AGR2	AGR3	TFF1	TCIM	PTHLH	ANKRD30A	BATF	SYTL2	TMC5	SCUBE2	DIO2	TBX3	FBP1	ACADSB	AFF3	SLC7A2	MLPH	TSPAN5	AR	CAPN8	FOXA1	TMEM45B	ELOVL5	FTO	INPP4B	SLC40A1	NQO1	SLC39A6	TTC39A	MISP	LYPD6B	VSIG2	RASEF	GPR160	MAGED2	PKIB	SMIM14	EFHD1	TOX3	PGM2L1	FASN	TSPAN15	MUCL1	CA12	CMBL	SUSD3	IRS1
ORG6HS_SC-1	2.01217	0.411439	1.05812	1.76625	1.66953	2.95215	-0.0487576	1.84553	1.18638	0.432672	1.03555	0.662121	3.15646	1.49495	1.20608	2.08838	0.907775	0.929987	1.25145	1.24479	0.830817	1.60848	1.49628	1.19187	0.913465	0.000262943	1.37962	0.916309	0.518616	0.379858	1.34061	1.08552	0.98703	0.0627825	1.47359	0.87076	0.948817	1.02676	1.00101	1.93572	1.68612	1.50074	1.03544	0.645021	0.4416	1.11941	0.50001	2.01707	0.824978
ORG6HS_SC-2	0.864014	1.29364	0.643178	-0.319078	1.82736	0.016229	-0.275134	0.478089	0.504936	1.24832	0.987876	0.496035	-0.0798561	1.30598	0.434931	1.33063	0.509543	1.69632	1.26017	1.79025	1.00559	1.60418	0.984837	0.946521	0.741907	-0.478579	-0.222424	1.26622	0.300209	0.824774	1.68855	1.16579	1.70409	-0.134012	1.05132	0.977265	1.06586	1.44089	1.06784	1.06572	0.950688	1.24634	0.503764	1.13854	-0.044677	1.39822	1.97201	-0.240947	1.00919
ORG6HS_MD-1	0.48837	1.70566	1.61089	1.04655	0.876089	0.115903	0.27951	1.10992	1.24875	1.09087	1.02908	2.12027	-0.297492	1.54404	1.93336	0.858376	1.95891	1.16591	1.30636	0.998761	1.45135	1.12321	1.5481	1.25763	1.59371	0.279242	1.06131	1.35624	1.20172	1.1544	1.15026	1.18348	1.56572	2.88357	1.05107	1.65859	1.70473	0.29856	1.34207	1.24625	1.27386	0.758947	2.00117	1.48561	1.41784	1.42013	1.27607	1.74666	-0.129448
ORG6HS_MD-2	1.6364	1.70863	1.86956	2.02605	0.818167	0.694028	2.42955	1.68505	2.11786	2.06341	2.09808	1.03383	-0.234835	1.01304	1.52719	0.771155	1.68977	1.39553	1.55769	1.2111	1.91329	0.963384	1.32475	1.87453	1.86046	1.14268	1.47324	1.75924	2.55421	1.85721	1.15386	1.83942	0.995368	0.931048	1.64607	1.70926	1.54895	0.0282649	1.84154	1.00644	1.34191	1.55687	1.54727	1.68463	2.53002	1.42585	0.51076	1.07393	0.0126029
ORG6LASP_SC-1	-0.414182	-0.699576	-0.686529	-0.60958	-0.686521	-0.46878	-0.917569	-0.683284	-0.646162	-0.755954	-0.729025	-1.01733	-0.367598	-0.733147	-0.670916	-0.663718	-0.670649	-0.79267	-0.708139	-0.765772	-0.728728	-0.757718	-0.721813	-0.689261	-0.800037	-1.11109	-1.07926	-0.73398	-0.651719	-1.57187	-0.736335	-0.699196	-0.905756	-0.514929	-0.452874	-0.668295	-0.899724	0.0338745	-0.811071	-0.709609	-0.673479	-0.732808	-0.740961	-0.634146	-0.62076	-0.787211	-0.739269	-0.53896	-0.766642
ORG6LASP_SC-2	-0.408061	-0.434876	-0.572191	-0.491926	-0.42258	-0.421144	-0.329168	-0.529743	-0.389371	0.189137	-0.281559	-0.881602	-0.33023	-0.465149	-0.493185	-0.250305	-0.562715	0.0285778	-0.400775	-0.160046	-0.308547	-0.322754	-0.469842	-0.37387	-0.503817	-1.08801	-0.986569	-0.379407	-0.549429	-1.20108	-0.333428	-0.272196	-0.538526	-0.458317	-0.217332	-0.294752	-0.467528	1.63788	-0.37666	-0.393342	-0.124946	-0.149883	-0.551408	-0.251426	-0.503028	-0.409023	-0.224089	-0.57921	-0.565461
ORG6LASP_MD-1	-0.579093	-0.637135	-0.599265	-0.507401	-0.619136	-0.444286	-0.997782	-0.594619	-0.547692	-0.435947	-0.557227	-0.961413	-0.358199	-0.651117	-0.588311	-0.398169	-0.556669	-0.520322	-0.608086	-0.541187	-0.584628	-0.670223	-0.605016	-0.56711	-0.258884	-0.630895	-0.884564	-0.574169	-0.591297	-0.605093	-0.605556	-0.595566	-0.634885	-0.40978	-0.440563	-0.566217	-0.692745	0.131363	-0.447174	-0.570556	-0.53775	-0.636984	-0.554326	-0.373818	-0.431607	-0.519702	-1.23182	-0.518878	-0.334381
ORG6LASP_MD-2	-0.745972	-0.682974	-0.591807	-0.497112	-0.69757	-0.478094	-0.715571	-0.64844	-0.647566	-0.548341	-0.689128	-0.981344	-0.39703	-0.751857	-0.628609	-0.513585	-0.659138	-0.745395	-0.68433	-0.698069	-0.715272	-0.722305	-0.708508	-0.70152	-0.392994	-0.877261	-0.927281	-0.698553	-0.409335	-0.763743	-0.719442	-0.802155	-0.709202	-0.411341	-0.568005	-0.561121	-0.570233	-0.109626	-0.572088	-0.702293	-0.812217	-1.01034	-0.616081	0.0928155	-0.480876	-0.631836	-1.18536	-0.687547	-0.43478
ORG6BA_SC-1	-0.586963	-0.699576	-0.711778	-0.643948	-0.707492	-0.487433	1.16195	-0.676992	-0.745977	-0.882126	-0.751303	-0.560768	-0.396215	-0.650474	-0.702871	-0.784662	-0.678198	-0.813148	-0.765875	-0.744855	-0.742773	-0.74281	-0.735375	-0.742422	-0.79375	-0.680802	1.02899	-0.769876	-0.565694	0.0975405	-0.748779	-0.660462	-0.800108	-0.621514	-0.912448	-0.821717	-0.853963	-0.989248	-0.873577	-0.764483	-0.789467	0.0262272	-0.633774	-1.07116	-0.624741	-0.668681	0.37334	-0.531732	2.1269
ORG6BA_SC-2	-0.726738	-0.653847	-0.695729	-0.612837	-0.631207	-0.494198	-0.485861	-0.655722	-0.700799	-0.869857	-0.704293	0.679968	-0.209796	-0.707511	-0.682209	-0.741551	-0.645988	-0.760028	-0.722815	-0.884268	-0.696913	-0.666972	-0.692158	-0.720906	-0.875472	1.85315	0.386774	-0.716672	-0.71845	-0.636808	-0.713513	-0.718619	-0.799214	-0.525029	-0.887867	-0.748931	-0.638468	-1.15439	-0.7605	-0.694701	-0.791693	-0.741815	-0.680362	-0.985975	-0.578932	-0.818925	0.0558728	-0.649116	-0.851053
ORG6BA_MD-2	-0.77562	-0.635683	-0.644611	-0.559424	-0.718761	-0.490218	0.617218	-0.672441	-0.735457	-0.77715	-0.709874	-0.519525	-0.104986	-0.744915	-0.678813	-0.791658	-0.656053	-0.773615	-0.749068	-0.725069	-0.72294	-0.690187	-0.71621	-0.74223	-0.748177	1.36027	-0.563436	-0.700509	-0.543033	0.294428	-0.742405	-0.776878	-0.504872	-0.396831	-0.865531	-0.763221	-0.446389	-1.23315	-0.68588	-0.701884	-0.730908	-0.964677	-0.7326	-0.785101	-0.555895	-0.775362	-1.13096	-0.575682	-1.54821
ORG6BA_MD-1	-0.764326	-0.675704	-0.679847	-0.597543	-0.707878	-0.494162	-0.718379	-0.657353	-0.644898	-0.755039	-0.728175	-0.0702472	-0.380227	-0.653846	-0.656644	-0.904889	-0.636587	-0.811145	-0.736587	-0.725636	-0.701246	-0.726284	-0.705036	-0.733235	-0.736414	0.231025	-0.666398	-0.724841	-0.545806	0.170374	-0.733817	-0.749139	-0.359645	-0.405645	-0.877433	-0.79162	-0.699308	-1.11117	-0.725517	-0.717262	-0.792115	-0.852625	-0.578119	-0.944993	-0.548945	-0.752871	-0.176572	-0.515584	0.656304
[truncated: 206 more columns]

## Sheet: Heatmap_LASP signature genes
Name	PIGR	MMP7	CCL28	SNORC	KRT15	GABRP	S100A1	NDRG2	RCAN1	LTF	CRABP1	ELF5	FOLR1	ALDH1A3	ROPN1B	LIF	CHI3L1	LINC01198	ROPN1	SAA2	KCNN4	S100A9	SLPI	LCN2	TTYH1	CTSV	CALML5	PI3	IGF2BP2	KRT23	IQCG	CYP24A1	FGFBP1	KRT16	CHI3L2	DAPP1	CDC42EP5	SLC25A37	CXCL3	AQP5	SCGB1D2	PPP1R14C	BBOX1	NCALD	RARRES1	ACTR3B	SCGB2A2	PPP1R1B	CLDN1
ORG6HS_SC-1	-0.577963	-0.675634	-0.609039	-0.608045	-1.20254	-0.791402	-0.851349	-0.680422	-0.304841	-0.666351	0.443877	-0.641067	-1.08873	-0.758341	-0.812179	-0.365418	-0.97679	-0.621416	-1.02459	-0.662136	-1.21362	-0.262865	-0.441423	-0.582098	-0.464471	-0.908762	-0.0566264	-0.607518	-1.09605	-0.188542	-0.123078	-0.501175	-0.480467	0.696763	-0.736396	-0.386085	-0.841587	-0.797722	0.565154	-0.582507	-0.58574	-1.15972	-0.913632	-0.921637	-0.850181	1.18678	-0.22702	1.6024	-0.647151
ORG6HS_SC-2	-0.639992	-0.708987	-0.612886	-0.687564	-1.00098	-0.815267	-0.83559	-0.696058	-0.547115	-0.686043	2.44843	-0.675969	-1.11889	-0.725593	-0.821333	-0.462993	-0.984714	-0.658215	-1.02044	-0.68225	-0.836772	-0.952378	-0.559599	-0.614463	-0.554762	-0.973475	2.78185	-0.683004	-1.18528	0.275386	-0.0350655	-0.649648	-0.547903	1.49138	-0.792884	-0.566095	-0.961219	-0.878293	-0.422949	1.67413	-0.660143	-1.05652	-0.930888	-0.771415	-0.835484	-1.10489	-0.551541	1.31794	-0.702702
ORG6HS_MD-1	-0.591852	-0.708456	-0.614243	-0.809092	-1.40361	-0.760441	-0.885843	-0.637379	-0.928988	-0.656777	1.07776	-0.635432	-1.05718	-0.756487	-0.783498	-0.702051	-0.977941	-0.658215	-0.948987	-0.655394	-1.16178	-1.02414	-0.704115	-0.516803	-0.510781	-0.939763	-0.0909658	-0.51069	-1.2575	-1.576	1.1296	-0.649648	-0.535066	-0.759485	-0.921445	-0.548091	-0.973179	-0.932442	-0.770877	-0.347736	-0.626432	-1.3035	-0.88928	-0.846016	-0.884036	0.257477	-0.428346	0.382222	-0.616894
ORG6HS_MD-2	-0.614792	-0.712108	-0.657725	-0.772655	-1.24207	-0.804875	-0.919382	-0.689988	-0.663955	-0.657931	0.730045	-0.665634	-1.13234	-0.454145	-0.81413	-0.340241	-0.976686	-0.658215	-1.03978	-0.677504	-1.08712	-1.08984	-0.740421	-0.498023	-0.601038	-0.983877	0.311584	-0.645198	-1.1735	-0.0386085	1.78221	-0.620158	-0.543459	-0.569478	-0.934344	-0.0638237	-1.00569	-0.948276	-0.556416	-0.328936	-0.650918	-1.30706	-0.93957	-0.90569	-0.780799	0.459544	-0.519625	-0.287076	-0.32119
ORG6LASP_SC-2	-0.0630588	2.2057	1.5119	0.46438	0.297992	1.44917	0.430487	1.25363	0.107942	1.13748	-0.141318	0.64585	0.0792717	0.68362	0.723682	1.25313	-0.0234586	1.61184	0.615601	-0.0284543	0.899615	-0.481956	0.578852	-0.0450426	2.36016	-0.326836	0.681249	0.0423151	-0.0114068	1.97986	1.0571	0.270984	-0.200861	0.81148	1.61567	1.6392	1.58819	0.862021	1.75778	0.190562	0.485822	0.725627	1.43421	1.51465	0.248831	-0.97413	-0.152627	0.302869	1.08851
ORG6LASP_SC-1	1.63794	1.51942	2.10219	1.23326	-0.143482	0.391122	1.18741	0.633101	2.72874	1.14433	-0.70245	1.39442	1.1733	1.70265	0.552408	2.65699	0.187215	1.87523	0.0824023	2.06099	0.416504	-0.00582351	2.44855	1.05819	-0.227802	0.726704	0.287984	1.81359	0.560772	1.59268	-0.358135	2.49034	1.33253	1.83886	0.763943	1.85041	1.8719	2.16416	2.03317	-0.219958	1.69294	0.896866	0.518023	0.538913	0.544196	1.78991	0.337247	-0.119586	2.46929
ORG6LASP_MD-1	1.98361	0.840396	0.704028	0.271785	0.267926	1.41104	0.608727	1.6681	-0.208141	1.38647	-0.329692	1.75819	0.688001	0.99364	1.85037	0.042106	0.272736	1.2655	1.08924	1.84308	0.756472	-0.182143	0.414228	0.704051	1.53863	-0.619512	-0.515674	1.01453	0.205486	0.179353	0.774348	1.42957	-0.165385	-0.712293	1.63615	0.728254	0.271457	0.915136	-0.0409472	0.410044	0.856169	0.0717786	0.497739	1.5387	0.735918	-0.387593	0.635817	0.0225792	0.62217
ORG6LASP_MD-2	1.22877	0.244345	0.757137	2.52717	0.369004	1.75162	2.31551	1.67524	0.01963	1.69478	-0.698911	1.4499	1.77044	1.79044	1.83327	0.128401	1.08287	0.296833	2.07299	0.747693	2.16452	0.159524	1.14472	2.64049	0.745502	-0.59187	-0.664678	1.93812	0.0754066	-0.518857	-0.19577	0.157243	-0.300391	-0.759513	1.11469	0.74702	0.421354	0.88399	0.0287319	2.24883	1.99836	-0.228506	2.07812	1.51347	2.53525	0.376506	2.93428	1.0862	0.570608
ORG6BA_SC-1	-0.598084	-0.247231	-0.603871	-0.215376	0.568196	-0.722875	-0.526267	-0.671774	-0.809667	-0.695243	-0.728494	-0.665955	-0.200479	-0.630601	-0.502859	-0.287636	-0.13356	-0.619146	-0.530036	-0.43801	-0.0418256	1.43282	0.0706349	-0.451373	-0.606013	1.16965	-0.686995	-0.496511	1.90009	0.248064	-0.472394	-0.0541533	2.71663	0.425557	-0.600158	-0.531983	0.691188	0.147217	0.0670955	-0.79257	-0.639747	1.39089	-0.428113	-0.653109	-0.648706	0.172267	-0.544137	-1.40195	-0.419856
ORG6BA_SC-2	-0.614152	-0.561985	-0.678465	-0.415547	0.687847	-0.632243	0.182773	-0.68964	0.752654	-0.709804	-0.652332	-0.671726	1.01779	-0.54983	-0.451994	-0.442113	0.548998	-0.557037	-0.266206	-0.600114	0.0721682	-0.59503	-0.721654	-0.618976	-0.58409	1.21247	-0.724352	-0.666807	0.867782	-0.197211	-0.839087	-0.574051	-0.297405	-0.620085	-0.721812	-0.942342	-0.0219288	-0.239379	-0.881355	-0.739119	-0.645849	0.356057	-0.706427	-0.420971	-0.347963	-0.731542	-0.548242	-0.902463	-0.691685
ORG6BA_MD-2	-0.579818	-0.615717	-0.67044	-0.467469	1.37879	0.0220074	-0.180449	-0.540541	0.460611	-0.608294	-0.726326	-0.655991	0.143531	-0.543737	-0.28951	-0.635993	2.33254	-0.618947	0.828163	-0.314385	0.170417	0.960653	-0.750326	-0.457027	-0.529809	1.6964	-0.774997	-0.575219	0.346432	-0.838803	-1.46483	-0.649648	-0.547176	-0.901876	-0.105252	-0.961898	-0.757096	-0.528975	-0.950448	-0.747514	-0.597951	1.24236	0.062461	-0.274592	0.514925	0.604441	-0.417979	-0.557564	-0.531807
ORG6BA_MD-1	-0.570616	-0.579736	-0.628587	-0.520847	1.42292	-0.497863	-0.526025	-0.624274	-0.60687	-0.682614	-0.720591	-0.636589	-0.274717	-0.751619	-0.484233	-0.844172	-0.351215	-0.658215	0.14165	-0.593514	-0.138579	2.04118	-0.739446	-0.618926	-0.565531	0.538878	-0.548379	-0.623596	0.767771	-0.917326	-1.25489	-0.649648	-0.431049	-0.941311	-0.318155	-0.964559	-0.28338	-0.647442	-0.828941	-0.765221	-0.626514	0.371726	0.217353	-0.312304	-0.231953	-1.64876	-0.517823	-1.44558	-0.819289
[truncated: 38 more columns]

## Sheet: Heatmap data_BA signature genes
Name	ACTA2	KRT5	KRT14	TPM2	TAGLN	MYLK	ACTG2	APOE	SAA1	DKK3	SGK1	MYL9	CRYAB	ANXA1	KRT17	MIA	PTN	SERPINB5	TUBB2B	ID4	OXTR	STK17A	FST	TLE4	MATN2	FAM126A	PPP1R14A	POSTN	LAMB3	LBH	ZNF503	SYNM	NGFR	GAS6	SYT8	AMIGO2	DST	ARC	TGFB1I1	SPP1	COL17A1	NNMT	S100A2	HBEGF	ADRB2	NES	SLC1A5	CD200	FBXO32
ORG6HS_SC-1	-0.609448	-0.816173	-0.899169	-0.721893	-0.606826	-0.656117	-0.799798	-0.831655	-0.733718	-0.689806	-1.06847	-0.606877	-1.13757	-1.18558	-0.675886	-0.976123	-0.803145	-0.790162	-0.508578	-1.33874	-0.367848	-0.766429	-0.674314	-1.58558	-0.827747	-1.313	-0.793153	-0.391208	-0.826016	-0.692749	-0.0120185	-0.824401	-0.65521	-0.886794	-0.60545	0.850364	-0.523847	2.07147	-1.00166	-0.778989	-0.633232	-0.974795	-0.598475	0.108262	-0.19752	-0.739826	-1.07228	-0.627484	-0.862302
ORG6HS_SC-2	-0.618398	-0.868537	-0.939778	-0.716638	-0.590548	-0.66854	-0.462195	-0.853427	-0.759583	-0.692059	-1.10908	-0.583242	-1.14347	-1.20837	-0.561289	-0.986113	-0.788915	-0.787581	1.06957	-1.2772	-0.289478	-0.829903	-0.662358	-0.672828	-0.801543	-1.17208	-0.679385	-0.342678	-0.900635	-0.669624	0.768652	-0.838702	-0.649384	-0.876189	-0.61151	1.1821	-0.850711	1.24721	-0.938398	-0.784554	-0.650398	-1.13634	-0.663851	-0.385332	-0.673986	-0.717349	-1.23907	-0.64765	-0.908963
ORG6HS_MD-1	-0.532382	-0.838807	-0.904659	-0.753836	-0.610572	-0.663472	-0.773551	-0.835772	-0.730419	-0.705696	-1.17221	-0.57437	-1.12965	-1.2379	-0.845953	-0.957554	-0.775822	-0.849344	-1.08992	-1.3814	-0.349398	-0.980088	-0.670816	-1.07566	-0.785149	-0.634843	-0.583415	-0.391208	-0.892713	-0.70496	-0.262729	-0.807075	-0.649507	-0.819289	-0.596346	-0.527533	-0.832372	-0.86629	-0.976135	-0.767042	-0.634996	-1.24504	-0.62467	-0.70924	-0.502014	-0.836307	-1.04851	-0.627565	-0.920212
ORG6HS_MD-2	-0.587466	-0.869323	-0.942974	-0.766284	-0.546469	-0.66644	-0.777543	-0.879862	-0.752457	-0.69316	-1.19608	-0.447434	-1.15667	-1.19904	-0.771638	-0.966957	-0.792774	-0.795262	0.0170354	-1.30328	-0.204387	-0.824325	-0.618544	-0.855357	-0.758231	-0.819143	-0.793153	-0.391208	-0.893727	-0.666455	-0.354238	-0.822679	-0.646964	-0.816649	-0.572306	-0.623771	-0.215518	-0.191394	-0.858758	-0.765128	-0.652907	-1.20519	-0.660307	-0.447238	-0.534279	-0.79794	-1.08904	-0.641642	-0.904349
ORG6LASP_SC-1	-0.494062	0.0867857	0.0223972	-0.529661	-0.469117	-0.567388	-0.557195	-0.670296	2.11843	-0.616719	1.45439	-0.554559	1.33106	1.34948	0.0288248	-0.354689	-0.148526	-0.120222	0.78112	0.327754	-0.4241	-0.37724	-0.586985	-0.17144	-0.378564	-0.552384	-0.461503	-0.391208	0.37206	-0.55287	-0.899089	0.97118	-0.567474	-0.374764	-0.566198	-1.09928	-0.620729	-0.580057	0.0927985	0.0628282	-0.564255	0.878162	-0.3419	0.0335217	2.70213	-0.690458	1.00918	-0.62383	-0.144964
ORG6LASP_SC-2	-0.488292	-0.236966	-0.333686	-0.548911	-0.475075	-0.575267	-0.302989	0.0202151	0.0464338	-0.579951	0.302745	-0.526069	0.891953	0.360269	-0.332272	0.0628902	0.139202	-0.402412	1.8738	0.863959	-0.364984	-0.608828	-0.603324	-0.173187	-0.54764	-0.500814	-0.581569	-0.391208	-0.313879	-0.45577	-0.674225	0.275105	-0.571728	-0.6671	-0.582218	-0.828138	-0.661465	0.0214903	-0.506579	1.57743	-0.613631	-0.34869	-0.586595	-0.373661	-0.0351333	-0.594923	-0.120157	-0.574706	-0.535732
ORG6LASP_MD-1	-0.350601	-0.318355	-0.338445	-0.499117	-0.222204	-0.467878	0.283026	0.358578	1.71076	-0.449183	-0.171584	-0.394668	1.03859	0.6428	-0.558302	-0.260247	0.651653	-0.339344	0.689071	0.88936	-0.0895294	-0.492585	-0.461521	0.722835	-0.339653	0.348135	-0.189226	-0.356079	-0.596545	-0.572072	-1.05883	1.84339	-0.400696	-0.46424	-0.573945	-0.980424	-0.169039	-0.676287	-0.547034	1.11609	-0.59785	0.236361	-0.426169	-0.418828	-0.339739	0.117518	-0.166127	-0.426825	-0.25555
ORG6LASP_MD-2	-0.318755	-0.659442	-0.431238	-0.588408	0.0824718	-0.518232	-0.784349	-0.295375	0.765452	-0.609309	0.0703161	-0.360156	0.848892	1.13156	-0.782686	1.42823	2.33609	-0.350992	-1.21329	0.859476	-0.324533	-0.243014	-0.55626	-0.0974994	-0.530411	-0.253988	-0.793153	-0.391208	-0.469748	-0.646206	-1.22692	1.7317	-0.155672	-0.341524	-0.500858	-1.1806	-1.00411	-0.873865	-0.0907658	1.98985	-0.648778	1.61087	-0.60353	-0.451451	-0.307301	-0.586556	0.266836	-0.597324	0.690543
ORG6BA_SC-1	-0.0518433	2.28365	2.08863	0.70165	-0.311636	0.405476	0.521947	-0.152468	-0.355037	0.45178	1.56278	-0.244618	-0.661595	1.05178	2.54863	0.198368	-0.590205	2.6215	0.678371	0.925488	-0.396471	1.20918	1.22978	1.27746	0.512224	1.23613	0.0763071	0.276384	2.32589	0.80636	1.9226	-0.569358	-0.0239385	0.913494	-0.0736861	0.725977	2.14497	1.18182	1.33637	-0.588351	1.59424	0.0660042	2.32235	3.07408	1.28665	0.552202	1.81155	0.526373	0.0638047
ORG6BA_SC-2	0.831354	0.696067	0.931793	1.62615	0.991596	1.35746	0.721179	0.64164	-0.540468	1.56967	0.756575	1.3488	0.562419	-0.147599	0.928273	0.818307	-0.19364	0.562976	-0.745556	0.483224	-0.0849773	1.26643	2.27786	-0.104236	0.877035	1.26429	1.7212	3.11457	0.932852	2.24197	1.19946	-0.445558	0.841401	1.23556	0.847741	1.78625	1.35323	0.289604	0.504999	-0.304459	1.56645	0.206201	0.321073	0.0764298	-0.15232	2.03115	0.856063	2.26336	0.863227
ORG6BA_MD-1	0.378511	1.33323	1.33806	0.857865	-0.0742452	0.635729	0.291663	1.08311	-0.569539	0.975398	-0.16461	0.313716	-0.226568	-0.161897	0.48127	-0.07281	-0.446011	0.538054	-0.52968	0.62345	-0.26002	0.731646	0.182501	1.6584	1.47168	0.991849	1.64175	-0.149453	0.732476	0.52776	1.00987	-0.587281	0.813835	1.42265	1.55708	0.389862	0.591898	-0.742069	1.07035	-0.67933	1.69021	0.545886	1.68536	-0.38112	-0.599341	0.671081	-0.138093	0.368917	0.477701
ORG6BA_MD-2	2.84138	0.20787	0.409074	1.93908	2.83262	2.38466	2.63981	2.41531	-0.199853	2.03903	0.735233	2.62948	0.782605	0.604505	0.541028	2.0667	1.41209	0.712785	-1.02194	0.327901	3.15573	1.91515	1.14398	1.07709	2.108	1.40585	1.4353	-0.195499	0.529983	1.38462	-0.412525	0.0736776	2.66534	1.67484	2.27769	0.305193	0.787698	-0.881622	1.91481	-0.0783465	0.14515	1.36657	0.176716	-0.125421	-0.647145	1.59141	0.929654	1.60838	2.4368
[truncated: 283 more columns]

## Sheet: Heatmap data_BL unique genes
Name	PIGR	MMP7	CCL28	SNORC	KRT15	GABRP	S100A1	NDRG2	RCAN1	LTF	CRABP1	ELF5	FOLR1	ALDH1A3	ROPN1B	LIF	CHI3L1	LINC01198	ROPN1	SAA2	KCNN4	S100A9	SLPI	LCN2	TTYH1	CTSV	CALML5	PI3	IGF2BP2	KRT23	IQCG	CYP24A1	FGFBP1	KRT16	CHI3L2	DAPP1	CDC42EP5	SLC25A37	CXCL3	AQP5	SCGB1D2	PPP1R14C	BBOX1	NCALD	RARRES1	ACTR3B	SCGB2A2	PPP1R1B	CLDN1
ORG6HS_SC-2	-0.577963	-0.675634	-0.609039	-0.608045	-1.20254	-0.791402	-0.851349	-0.680422	-0.304841	-0.666351	0.443877	-0.641067	-1.08873	-0.758341	-0.812179	-0.365418	-0.97679	-0.621416	-1.02459	-0.662136	-1.21362	-0.262865	-0.441423	-0.582098	-0.464471	-0.908762	-0.0566264	-0.607518	-1.09605	-0.188542	-0.123078	-0.501175	-0.480467	0.696763	-0.736396	-0.386085	-0.841587	-0.797722	0.565154	-0.582507	-0.58574	-1.15972	-0.913632	-0.921637	-0.850181	1.18678	-0.22702	1.6024	-0.647151
ORG6HS_SC-1	-0.639992	-0.708987	-0.612886	-0.687564	-1.00098	-0.815267	-0.83559	-0.696058	-0.547115	-0.686043	2.44843	-0.675969	-1.11889	-0.725593	-0.821333	-0.462993	-0.984714	-0.658215	-1.02044	-0.68225	-0.836772	-0.952378	-0.559599	-0.614463	-0.554762	-0.973475	2.78185	-0.683004	-1.18528	0.275386	-0.0350655	-0.649648	-0.547903	1.49138	-0.792884	-0.566095	-0.961219	-0.878293	-0.422949	1.67413	-0.660143	-1.05652	-0.930888	-0.771415	-0.835484	-1.10489	-0.551541	1.31794	-0.702702
ORG6HS_MD-1	-0.591852	-0.708456	-0.614243	-0.809092	-1.40361	-0.760441	-0.885843	-0.637379	-0.928988	-0.656777	1.07776	-0.635432	-1.05718	-0.756487	-0.783498	-0.702051	-0.977941	-0.658215	-0.948987	-0.655394	-1.16178	-1.02414	-0.704115	-0.516803	-0.510781	-0.939763	-0.0909658	-0.51069	-1.2575	-1.576	1.1296	-0.649648	-0.535066	-0.759485	-0.921445	-0.548091	-0.973179	-0.932442	-0.770877	-0.347736	-0.626432	-1.3035	-0.88928	-0.846016	-0.884036	0.257477	-0.428346	0.382222	-0.616894
ORG6HS_MD-2	-0.614792	-0.712108	-0.657725	-0.772655	-1.24207	-0.804875	-0.919382	-0.689988	-0.663955	-0.657931	0.730045	-0.665634	-1.13234	-0.454145	-0.81413	-0.340241	-0.976686	-0.658215	-1.03978	-0.677504	-1.08712	-1.08984	-0.740421	-0.498023	-0.601038	-0.983877	0.311584	-0.645198	-1.1735	-0.0386085	1.78221	-0.620158	-0.543459	-0.569478	-0.934344	-0.0638237	-1.00569	-0.948276	-0.556416	-0.328936	-0.650918	-1.30706	-0.93957	-0.90569	-0.780799	0.459544	-0.519625	-0.287076	-0.32119
ORG6LASP_SC-2	-0.0630588	2.2057	1.5119	0.46438	0.297992	1.44917	0.430487	1.25363	0.107942	1.13748	-0.141318	0.64585	0.0792717	0.68362	0.723682	1.25313	-0.0234586	1.61184	0.615601	-0.0284543	0.899615	-0.481956	0.578852	-0.0450426	2.36016	-0.326836	0.681249	0.0423151	-0.0114068	1.97986	1.0571	0.270984	-0.200861	0.81148	1.61567	1.6392	1.58819	0.862021	1.75778	0.190562	0.485822	0.725627	1.43421	1.51465	0.248831	-0.97413	-0.152627	0.302869	1.08851
ORG6LASP_SC-1	1.63794	1.51942	2.10219	1.23326	-0.143482	0.391122	1.18741	0.633101	2.72874	1.14433	-0.70245	1.39442	1.1733	1.70265	0.552408	2.65699	0.187215	1.87523	0.0824023	2.06099	0.416504	-0.00582351	2.44855	1.05819	-0.227802	0.726704	0.287984	1.81359	0.560772	1.59268	-0.358135	2.49034	1.33253	1.83886	0.763943	1.85041	1.8719	2.16416	2.03317	-0.219958	1.69294	0.896866	0.518023	0.538913	0.544196	1.78991	0.337247	-0.119586	2.46929
ORG6LASP_MD-2	1.98361	0.840396	0.704028	0.271785	0.267926	1.41104	0.608727	1.6681	-0.208141	1.38647	-0.329692	1.75819	0.688001	0.99364	1.85037	0.042106	0.272736	1.2655	1.08924	1.84308	0.756472	-0.182143	0.414228	0.704051	1.53863	-0.619512	-0.515674	1.01453	0.205486	0.179353	0.774348	1.42957	-0.165385	-0.712293	1.63615	0.728254	0.271457	0.915136	-0.0409472	0.410044	0.856169	0.0717786	0.497739	1.5387	0.735918	-0.387593	0.635817	0.0225792	0.62217
ORG6LASP_MD-1	1.22877	0.244345	0.757137	2.52717	0.369004	1.75162	2.31551	1.67524	0.01963	1.69478	-0.698911	1.4499	1.77044	1.79044	1.83327	0.128401	1.08287	0.296833	2.07299	0.747693	2.16452	0.159524	1.14472	2.64049	0.745502	-0.59187	-0.664678	1.93812	0.0754066	-0.518857	-0.19577	0.157243	-0.300391	-0.759513	1.11469	0.74702	0.421354	0.88399	0.0287319	2.24883	1.99836	-0.228506	2.07812	1.51347	2.53525	0.376506	2.93428	1.0862	0.570608
ORG6BA_SC-1	-0.598084	-0.247231	-0.603871	-0.215376	0.568196	-0.722875	-0.526267	-0.671774	-0.809667	-0.695243	-0.728494	-0.665955	-0.200479	-0.630601	-0.502859	-0.287636	-0.13356	-0.619146	-0.530036	-0.43801	-0.0418256	1.43282	0.0706349	-0.451373	-0.606013	1.16965	-0.686995	-0.496511	1.90009	0.248064	-0.472394	-0.0541533	2.71663	0.425557	-0.600158	-0.531983	0.691188	0.147217	0.0670955	-0.79257	-0.639747	1.39089	-0.428113	-0.653109	-0.648706	0.172267	-0.544137	-1.40195	-0.419856
ORG6BA_SC-2	-0.614152	-0.561985	-0.678465	-0.415547	0.687847	-0.632243	0.182773	-0.68964	0.752654	-0.709804	-0.652332	-0.671726	1.01779	-0.54983	-0.451994	-0.442113	0.548998	-0.557037	-0.266206	-0.600114	0.0721682	-0.59503	-0.721654	-0.618976	-0.58409	1.21247	-0.724352	-0.666807	0.867782	-0.197211	-0.839087	-0.574051	-0.297405	-0.620085	-0.721812	-0.942342	-0.0219288	-0.239379	-0.881355	-0.739119	-0.645849	0.356057	-0.706427	-0.420971	-0.347963	-0.731542	-0.548242	-0.902463	-0.691685
ORG6BA_MD-1	-0.579818	-0.615717	-0.67044	-0.467469	1.37879	0.0220074	-0.180449	-0.540541	0.460611	-0.608294	-0.726326	-0.655991	0.143531	-0.543737	-0.28951	-0.635993	2.33254	-0.618947	0.828163	-0.314385	0.170417	0.960653	-0.750326	-0.457027	-0.529809	1.6964	-0.774997	-0.575219	0.346432	-0.838803	-1.46483	-0.649648	-0.547176	-0.901876	-0.105252	-0.961898	-0.757096	-0.528975	-0.950448	-0.747514	-0.597951	1.24236	0.062461	-0.274592	0.514925	0.604441	-0.417979	-0.557564	-0.531807
ORG6BA_MD-2	-0.570616	-0.579736	-0.628587	-0.520847	1.42292	-0.497863	-0.526025	-0.624274	-0.60687	-0.682614	-0.720591	-0.636589	-0.274717	-0.751619	-0.484233	-0.844172	-0.351215	-0.658215	0.14165	-0.593514	-0.138579	2.04118	-0.739446	-0.618926	-0.565531	0.538878	-0.548379	-0.623596	0.767771	-0.917326	-1.25489	-0.649648	-0.431049	-0.941311	-0.318155	-0.964559	-0.28338	-0.647442	-0.828941	-0.765221	-0.626514	0.371726	0.217353	-0.312304	-0.231953	-1.64876	-0.517823	-1.44558	-0.819289
[truncated: 38 more columns]
