# Supplementary material for: Breast organoid suspension cultures maintain long-term estrogen receptor expression and responsiveness
Source: Research Square preprint supplement (doi:10.21203/rs.3.rs-4463390/v1), 2024-06-17
Supplement: Supplementary file 7 [file b02d858224924614203e9249.xlsx]

## Sheet: Primer sets
	Primer	Sequence :
	h-ESR1-F	AAGAGCTGCCAGGCCTGCC
	h-ESR1-R	TTGGCAGCTCTCATGTCTCC
	h-PGR-F	GGGTGCTGGAGGCAGCAGTT
	h-PGR-R	GGAGGGCTGGGTTGGCTCTG
	h-TFF1-F	GGTGATCTGCGCCCTGGTCCT
	h-TFF1-R	ACTGGGAGGGCGTGACACCA
	h-GREB1-F	CGCCAGCTCCTGCAACGACA
	h-GREB1-R	GCGGCAGGCGCAGATGATGA
	h-WNT4-F	GCATCTCAGAGGAGGAGACG
	h-WNT4-R	GGAACTGGTACTGGCACTCC
	h-RPS28-F	CGATCCATCATCCGCAATG
	h-RPS28-R	AGCCAAGCTCAGCGCAAC
	h-RPL13A-F	CCTGGAGGAGAAGAGGAAAGAGAAA
	h-RPL13A-R	TTGAGGACCTCTGTGTATTTGTCAA

## Sheet: Antibody list
REAGENT or RESOURCE		SOURCE		IDENTIFIER
Antibodies
	Estrogen Receptor α (D6R2W) Rabbit mAb (Alexa Fluor® 647 Conjugate)	Cell Signaling		Cat# 57761; RRID:AB_2799533
	Progesterone Receptor A/B (D8Q2J) XP® Rabbit mAb (Alexa Fluor® 488 Conjugate)	Cell Signaling		Cat #35591; RRID:AB_2799080
	Recombinant Alexa Fluor® 488 Anti-FOXA1 antibody [EPR10881]	abcam		Cat# ab197235, RRID:N/A
	CD133 (D2V8Q) XP® Rabbit mAb	Cell Signaling		Cat# 64326; RRID: AB_2721172
	α-Smooth Muscle Actin (D4K9N) XP® Rabbit mAb (Alexa Fluor® 647 Conjugate)	Cell Signaling		Cat# 76113; RRID: AB_2857972
	Alexa Fluor® 568 Goat Anti-Rabbit IgG (H+L), highly cross-adsorbed	Invitrogen		Cat# ab129002; RRID: N/A
	Alexa Fluor® 647 anti-human CD326 (EpCAM) Antibody	Biolegend		Cat# 324212; RRID:AB_756086
	PE anti-human/mouse CD49f	Biolegend		Cat# 313612; RRID:AB_893374
