# Supplementary material for: Breast organoid suspension cultures maintain long-term estrogen receptor expression and responsiveness
Source: Research Square preprint supplement (doi:10.21203/rs.3.rs-4463390/v1), 2024-06-17
Supplement: Supplementary file 8 [file c84c232a37eb1c46003c688d.xlsx]

## Sheet: Sheet1
ASSAY and RESOURCE		SOURCE		IDENTIFIER
Critical Commercial Assays
PowerUp SYBR Green Master Mix		ThermoFisher		Cat# A25742
TaqMan Reverse Transcription Reagents		ThermoFisher		Cat# 4304134
Deposited Data
RNA sequencing data		Gene Expression Omnibus		GSE266935
Eperimental Models
Human breast tissues
Donor infromation see supplementary data 1
Oligonucleotides
RT-PCR primer sequences see supplementary data 3		This paper		N/A
Antibodies
List of Antibodies used for this study see supplementary data3		This paper		N/A
Software and Algorisms
ImageJ		NIH		https://imagej.net/ij/
GraphPad Prism		GraphPas Software		https://www.graphpad.com/scientific-software/prism/
FlowJo		FLOWJO, LLC		https://www.flowjo.com/
Biorender		Biorender		https://www.biorender.com/
NIS-Elements Viewer		Nikon		https://www.microscope.healthcare.nikon.com/products/software/nis-elements/viewer
Partek Flow Genomic Analysis Software		Partek		https://www.partek.com/partek-flow/
